# Supplementary material for: Human response to severe drought in Early Modern Catalonia. The case of Barcelona, Western Mediterranean (1620–1650)
Source: Copernicus journal article supplement (doi:10.5194/cp-2020-33), 2020-04-16
Supplement: Supplementary file [file cp-2020-33-RC1-supplement.pdf]

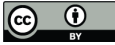

1 **Human response to severe drought in Early Modern**  
2 **Catalonia. The case of Barcelona, Western Mediterranean**  
3 **(1620-1650)**  
4

5 Santiago Gorostiza<sup>1,2</sup>, Maria Antònia Martí Escayol<sup>3</sup>, Mariano Barriendos<sup>4</sup>

6 <sup>1</sup> Centre d’Histoire de Sciences Po, Paris, 75006, France

7 <sup>2</sup> Institut de Ciència i Tecnologia Ambientals, ICTA-UAB, Barcelona, 08193, Spain

8 <sup>3</sup> Department of Modern and Contemporary History, Autonomous University of Barcelona, 08193, Spain

9 <sup>4</sup> Department of History and Archaeology, University of Barcelona, 08001, Spain

10 *Correspondence to:* Santiago Gorostiza (santiago.gorostiza@sciencespo.fr)

11  
12

13 **ABSTRACT:** Combining historical climatology and environmental history, this article  
14 examines the diverse range of strategies deployed by the city government of Barcelona to  
15 confront the recurrent drought episodes experienced between 1626 and 1650. First, our  
16 reconstruction of drought episodes for the period 1525-1821, based on *pro pluvia*  
17 rogations as documentary proxy data, identifies the years 1625-1635 and 1640-1650 as  
18 the most significant drought events of the period 1521-1825 (highest Drought  
19 Frequency Weighted Index of the series). Throughout the article, we focus on human  
20 responses to drought and discuss how water scarcity was perceived and confronted by  
21 Barcelona city authorities. We present the ambitious water supply projects launched by  
22 the city government, together with the construction of windmills as an alternative to  
23 watermills in order to mill grain, as attempts to cope with diminishing water flows. The  
24 context was aggravated by political instability, related first to the tensions between the  
25 centralising efforts of the Spanish King Philip IV and later to the impact of the Thirty  
26 Years’ War in the border region between the French and Spanish Crowns (1635-1659).  
27 Finally, we interpret the efforts of the city government to codify and appropriate  
28 knowledge about urban water supply as an attempt to systematise historical information  
29 on infrastructure to improve institutional capacities to cope with water scarcity in the  
30 future. These efforts materialised in the elaboration of the *Llibre de les Fonts de la Ciutat*  
31 *de Barcelona* (“Book of Fountains of the City of Barcelona”), a manual compiling the  
32 knowledge of Barcelona’s water supply from source to tap, written by the Barcelona  
33 water city officer in 1650, after three decades of experience in his post.  
34

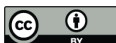

## 35 1. Introduction

36

37 In July 1650, during one of the hardest droughts remembered in Barcelona, Francesc  
38 Sociés, the city water officer (“mestre de les fonts”), started writing a book that described  
39 in great detail the water supply and distribution system of the city: the *Llibre de les Fonts*  
40 *de la Ciutat de Barcelona* (“Book of Fountains of the City of Barcelona”). At the time,  
41 Sociés had been in his post for over thirty years, overseeing the city’s fountains and water  
42 supply, and was approaching retirement. He was a crucial actor and a unique witness of  
43 the turbulent times that the water supply of the main city of Catalonia was going through,  
44 marked by recurrent droughts since the mid-1620s. In 1627 he had taken part in the  
45 ambitious – and eventually unsuccessful – project to build a water canal from the  
46 Llobregat River to Barcelona. In 1634, he had been excommunicated by the Cathedral’s  
47 Chapter of Barcelona after cutting its water supply following the orders of the city  
48 government – the Consell de Cent. During the 1640s he left no stone unturned to find the  
49 origin of the water losses that affected one of the main fountains of the city and worked  
50 hard to increase the sources of the urban water supply system. With three decades of  
51 experience behind him, he was growing old with no successor in sight. Suffering the  
52 impacts of drought almost every year, and well-aware of the precious knowledge that  
53 Francesc Sociés embodied, the city government approached him with a proposal. They  
54 asked the city water officer to write a book compiling all his knowledge about Barcelona’s  
55 water supply system, from source to tap. This book would perpetually be kept in the city  
56 archives, in order to illuminate the work of future water city officers and improve water  
57 management. Sociés took months to reply, but finally accepted under the condition of  
58 receiving a lifetime pension. On November 1650, he delivered what became known as  
59 the *Llibre de les Fonts* (“Book of Fountains”) (Archival source AS1).

60 This article focuses on the three decades (1620-1650) leading to the codification of  
61 Barcelona water knowledge into the Book of Fountains and examines them from the  
62 perspective of historical climatology and environmental history. This period coincides  
63 with the years of Francesc Sociés as city water officer. Key to the relevance of our case  
64 study, a systematic analysis of 165 tree-ring series in the Mediterranean for the last 500  
65 years points to an acute period of drought between 1620 and 1640, an episode that  
66 affected the whole Western Mediterranean (Nicault *et al.*, 2008). Our analysis of  
67 documentary sources for the city of Barcelona, drawing on *pro pluvia* rogations as proxy  
68 data, confirms this assessment. We document how the severe droughts experienced in the  
69 city during 1625-1635 and 1640-1650 stand out within the period covered by *pro pluvia*  
70 rogations (1521-1825). While the period 1625-1635 had already been identified by  
71 research on historical climatology as severely dry in Catalonia (Díaz, 1984; Martín-Vide  
72 and Barriendos, 1995; Rodrigo and Barriendos, 2008), in this paper we establish that  
73 Barcelona suffered the most significant drought event of the period 1521-1825 during  
74 these years (highest Drought Frequency Weighted Index of the series).

75 Once the local and regional significance of drought during the period of study (1620-  
76 1650) has been established with biological proxies from the existing literature and with  
77 our documentary data, we move on to examine the different strategies deployed by the  
78 city to cope with drought, as well as several conflicts that broke out during this period,  
79 related to power struggles around food and water supply. Throughout the article, we  
80 combine the detailed account written by Francesc Sociés in 1650 with abundant municipal  
81 and religious documents from the previous thirty years. Finally, we interpret the efforts  
82 of the city government to codify and appropriate water supply knowledge –successfully  
83 materialised in the Book of Fountains– as an attempt to systematise historical information

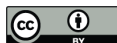

84 on infrastructure to improve the institutional abilities to cope with water scarcity and  
85 manage water resources more efficiently – in other words, to better adapt to drought or  
86 other disturbances affecting water supply.

87 Our research is the first academic analysis of the Book of Fountains, which has been kept  
88 in Barcelona city archive since it was delivered in 1650. While the book has been  
89 mentioned in the literature about Barcelona’s history (Voltes Bou, 1967; Cubeles, 2011),  
90 there is no systematic analysis of Francesc Sociés work. No modern editions of the Book  
91 of Fountains have ever been published, and during our research we have carried out the  
92 first complete transcription of the text. This is therefore the first article that presents the  
93 Book of Fountains and contextualises its elaboration within the historical climatology of  
94 the city of Barcelona (Western Mediterranean). As a manual of urban water supply, the  
95 Book of Fountains constitutes a rare documentary source. Although urban water supply  
96 was a common problem in the context of pre-modern Europe, we have only identified  
97 another book that shares some of its features. It is *Le Livre des Fontaines de Rouen*,  
98 written by Jacques Le Lieur between 1524 and 1525 (Sowina, 2016).

99 In contrast to the development of historical climatology research in Catalonia, little work  
100 has been done on the human response to drought beyond acknowledging that climate  
101 conditions in the 17<sup>th</sup> century accentuated the agricultural, social and political crisis (Serra  
102 i Puig and Ardit, 2008). The research of Antoni Simon i Tarrés, who highlighted the  
103 importance of drought among the complex interaction of factors that led to social unrest  
104 in Barcelona and Catalonia during the late 1620s and 1630s stands out among the few  
105 publications on the topic (Simon i Tarrés, 1981, 1992). The relevance of the climatic  
106 factor in the Spanish context during the 17<sup>th</sup> century has also been underlined by Geoffrey  
107 Parker, who pointed out that during the reign of Philip IV Spain “suffered extreme  
108 weather without parallel in other periods, particularly in 1630–2 and 1640–3” (Parker  
109 2013:289) and examined the revolt of Catalonia against the Spanish King (1640-1651) in  
110 this context.

111 However, neither Parker nor Simon i Tarrés explicitly address the human response to  
112 climatic disturbances in Catalonia during these years. More recently, Mar Grau-Satorras  
113 has used the example of the town of Terrassa (Barcelona region, Catalonia) to examine  
114 how local communities combined different strategies to cope with drought, including  
115 infrastructural, institutional and symbolic responses which changed throughout time  
116 (Grau-Satorras *et al.*, 2016, 2018; Grau-Satorras, 2017). Along these lines, our research  
117 focuses on Barcelona as an example of Western Mediterranean urban agglomeration  
118 (40,000 citizens). We discuss the elaboration of the Book of Fountains among other  
119 adaptation strategies, underlining the relevance and novelty of the attempt of Barcelona  
120 government to codify water knowledge in the form of a book as a tool for future water  
121 managers.

122 The article proceeds as follows. In the next section, we provide an overview of droughts  
123 during the period 1521-1825. Due to lack of instrumental data, we use a compilation of  
124 archival religious and municipal sources about *pro pluvia* rogations (rain rogations) as  
125 proxy data for drought (Martín-Vide & Barriendos, 1995; Barriendos, 1996; Barriendos,  
126 1997). Our work demonstrates the comparative significance of the period of study (1620-  
127 1650). Following this, in section 3, we draw on municipal sources to narrate the growing  
128 difficulties experienced by water supply in Barcelona to face the severe drought episodes  
129 that started in 1626-1627. We analyse the proposal of the city government to build a water  
130 canal from the river Llobregat under the light of the water scarcity caused by drought.  
131 Similarly, we interpret the great expansion of windmills supported by the Consell de Cent



132 as an alternative for milling grain when there was not enough water in the city's mills'  
133 canals. Finally, we introduce the major conflict that confronted the city government with  
134 the Cathedral in 1634, leading to the excommunication of the city water officer and the  
135 members of the Consell, and relate it to the power struggles about food and water supply.

136 In section 4, we turn our attention to the efforts that the city government carried out to  
137 increase its control of water supply and improve its management. After discussing the  
138 difficulties faced by Francesc Sociés to prevent water thefts during the 1640s, we focus  
139 on the proposal presented by the Consell de Cent to the city water officer. We examine  
140 the Book of Fountains as an example of codification of water knowledge of the past to  
141 prevent future problems; in other words, both as a book depository of knowledge and as  
142 a tool to improve adaptation to diminishing water flows. Finally, in the conclusions we  
143 summarise the relevance of our case study in the context of the 1620-1640 drought in the  
144 Western Mediterranean and call for interdisciplinary work that combines climate  
145 reconstruction with critical analysis of social responses to extreme climate events.

146

## 147 2. Climatic context

148

149 The climatic conditions during the 17<sup>th</sup> century can be considered as part of the climatic  
150 episode known as the Little Ice Age (LIA). Paleoclimatic research has pointed to a higher  
151 frequency and severity of cold spells during this episode (Pfister *et al.*, 1996; Pfister *et al.*  
152 1998; Gilvie 2001). More recently it has also identified and analysed a general increase  
153 in the irregularity of rainfall patterns, manifested in the emergence of  
154 hydrometeorological extreme episodes with great social and environmental impact. At  
155 the climatic scale, in the Spanish Mediterranean this increase in the frequency and  
156 severity of extreme hydrometeorological events manifests in periods of around 40 years  
157 for the case of extraordinary rainfalls leading to floods (Barriendos and Martín-Vide,  
158 1998; Llasat *et al.*, 2005; Barriendos *et al.*, 2019). In the case of extreme drought episodes,  
159 the behaviour observed in the frequency of these type of events in the coast of Catalonia  
160 allows to identify many recurring events of medium intensity and some of very high  
161 intensity for the Catalan cities studied (Barcelona, Girona, Tarragona, and Tortosa, see  
162 Figure 1): 1520s, 1540s, 1560s, 1620s (c. 1625-1635), 1750s, 1812-1824.

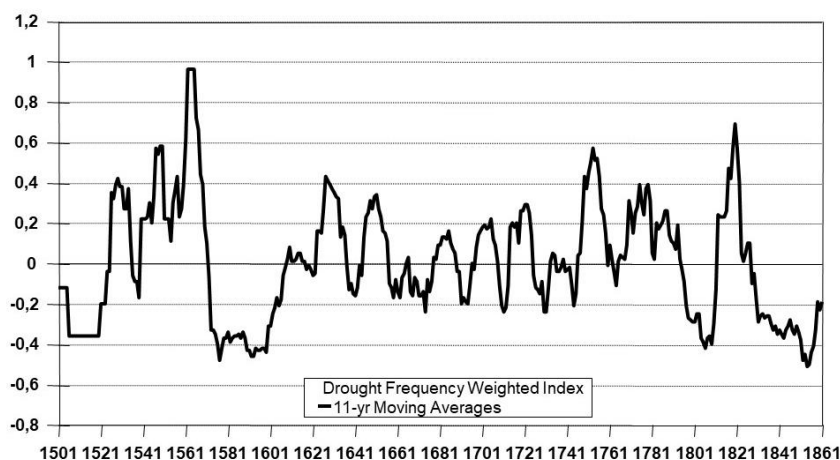

163

164

165

**Figure 1.** Drought Frequency Weighted Index. Standardised values. 11 years moving averages from 4 locations: Girona, Barcelona, Tarragona and Tortosa. Data adapted from Oliva *et al.*, 2018.

166

167 Figure 1 also shows how the drought that characterises the period of study in Catalonia  
168 extends during a significantly long period, including a lower intense drought immediately  
169 after the 1625-1635 pulse. But in order to better interpret the impact and perception of  
170 these drought episodes, it is crucial to set them against the very lack of any similar  
171 experience in the previous 50 years. During most of the period 1570-1600 there are no  
172 traces of drought episodes in the Catalan coast, and the episodes of the early 1600s were  
173 less intense and relatively brief (Figure 1).

174 If we focus in the case of Barcelona and examine in detail the behaviour of drought  
175 drawing on the records of *pro pluvia* rogations, the results show a distribution of frequent  
176 droughts between 1521 and 1825, with different degrees of intensity. By using yearly  
177 weighted indexes, we can identify the decade of 1560s and 1625-1635 as the two most  
178 significant drought events of these three centuries in the city of Barcelona. But the latter  
179 stands out for its extreme severity (Figure 2).

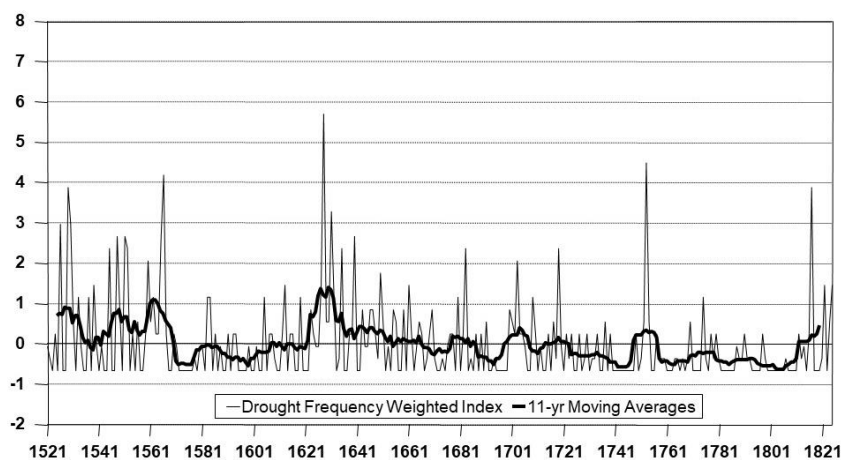

180

181

**Figure 2.** Drought Frequency Weighted Index. Standardised values. City of Barcelona (1521-1825).

182

183 In order to improve the characterisation of climatic events in Barcelona, there is a variable  
184 that provides useful information to understand how drought was perceived and the  
185 responses it generated. In the case of Barcelona, the level 2 of *pro pluvia* rogations  
186 involved the public exhibition of a specific relic: the remains of Santa Madrona (Martín-  
187 Vide & Barriendos, 1995). The public exhibition of this relic in the high altar of the  
188 Cathedral lasted until the authorities established that the drought was over. In this moment,  
189 the urn containing the Saint's remains was taken back to the Chapel of Santa Madrona in  
190 the near mountain of Montjuïc. This liturgical pattern allows for determining the  
191 perception of drought by the Barcelona city authorities at a daily resolution. In other  
192 words, it introduces the possibility of analysing the duration of drought episodes as  
193 perceived by local authorities. On this base, the development of an index of drought  
194 duration shows relevant results (Figure 3). Figure 3 illustrates that the 1620s drought and  
195 its successive episodes were perceived as longer than any other registered until the time.  
196 While it is difficult to extract more details with these historical records, it is evident that  
197 the drought registered had an extraordinary magnitude. However, the long duration of the  
198 rain rogations may also be related to the perception of an extreme anomaly by the city  
199 authorities, since almost no drought conditions had been experienced in the previous 50  
200 years.

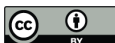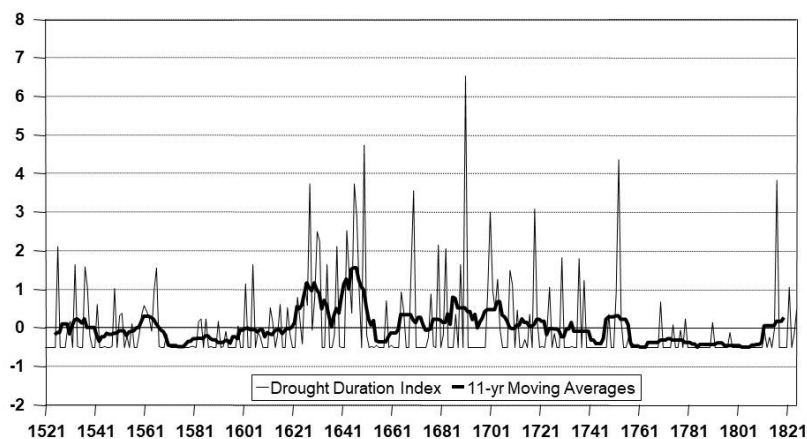

201  
202  
203

**Figure 3.** Drought Duration Index. Standardised values. City of Barcelona (1521-1825).

204 The analysis of drought duration presented in Figure 3 reveals another significant detail.  
205 After the severe 1620s drought, there was a less intense episode of drought, but very close  
206 in time, around the 1640s. Perhaps impressed by the previous drought, in this occasion  
207 the duration of rain rogations of level 2 – involving the exhibition of Santa Madrona– was  
208 as long or even more than in the previous episode (Figure 3). These results do not allow  
209 to analyse in detail the development of the drought episode as a natural episode but  
210 provide an entry point to the perceptions and social response to an extraordinary climate  
211 event. The first drought episode of the period of study (1620s) had such a social impact  
212 that the almost consecutive episode of the 1640s generates a proportional response. In  
213 front of the impact of drought on water resources and due to the limited references  
214 available after two generations without experiencing similar events, the duration of the  
215 religious responses may have been extended as a response against a challenging situation  
216 for local authorities.

217 ~~After describing the recurrence of drought during these years,~~ the following sections  
218 examine how Barcelona, an urban human community of nearly 40,000 people,  
219 experienced the years 1620-1650. We interpret several events of the period of study in  
220 relation to drought, from institutional efforts to build water infrastructure to the  
221 elaboration of the Book of Fountains. In order to better integrate the role of rain rogations  
222 as proxy data for drought with the events discussed in the following sections, Figure 4  
223 presents drought rogations in Barcelona month by month, from 1601 to 1650.



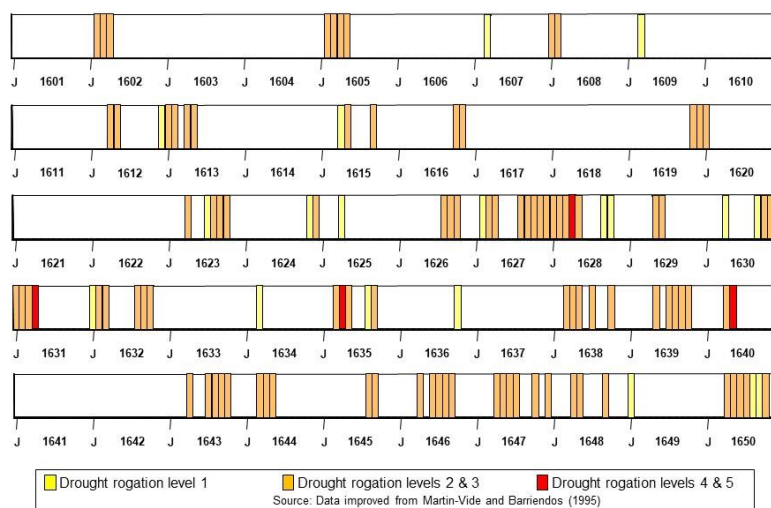

224

225 **Figure 4:** Monthly drought rogations levels in Barcelona, 1601-1650. Data improved from Martín-Vide  
226 and Barriendos, 1995.

227

### 228 3. Struggling for water supply in Barcelona

229

230 The years 1626-1627 were a turning point for the water supply of the city of Barcelona.  
231 During the first two decades of the 17<sup>th</sup> century there had been a great abundance of water,  
232 even accompanied with extreme rain episodes such as the catastrophic floods of 1617  
233 (Thorndycraft *et al.*, 2006). In line with these years of abundance, during the early 1620s  
234 the city government supported the expansion of the water distribution system, ongoing in  
235 the first quarter of the 17<sup>th</sup> century, and gave water concessions to several aristocratic  
236 houses and monasteries, as well as completing a pipe to supply the city harbour (AS1,  
237 chapters 65, 69, 79 and 98). This perception of abundance came to an end between 1626  
238 and 1627. In the words of Francesc Sociés responsible for the management of water  
239 supply in the city, “the abundance of waters lasted until the year 1626 (...). Already in  
240 the year 1627 came a great drought and in the fountains of the city there was a great lack  
241 of water” (AS1, chapter 65). Sociés account concurs with the available information from  
242 rain rogations, which points to the second half of 1626 as the beginning of six years of  
243 recurrent droughts (1626-1632, see Figure 4).

244 During these years, the water supplied to Barcelona’s fountains came from several  
245 underground drainage channels originating in the hills surrounding the city. These  
246 structures, known as *mines d’aigua* (“water mines”) in Catalan and as *viajes de agua*  
247 (“water journeys”) in Spanish, were common in all the Mediterranean and originated in  
248 the medieval *qanats* established by Muslim settlers (Guàrdia, 2011; Custodio, 2012). The  
249 recurrent dry years starting in 1626-1627 seriously reduced the amount of water coming  
250 from these sources and prompted serious efforts from the Consell de Cent to diversify the  
251 water supply sources of the city. In addition, the reduction in water flows in irrigation



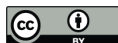

252 channels near Barcelona sometimes compromised the use of watermills to mill the grain,  
253 and therefore put in danger the supply of flour. To confront these problems, the city  
254 government developed a wide array of responses, from ambitious water transfer projects  
255 to the improvement of the existing water supply or the shift from mills relying on  
256 waterpower to windmills. In this section, we discuss these initiatives and argue that  
257 recurrent drought and limited water supply during the years 1626-1650 heightened micro  
258 and macropolitical tensions in Barcelona.

259 A first major response by the Barcelona city government came already in 1627 in the  
260 form of an ambitious proposal: a project for an open water canal (approximately 12 km  
261 long) connecting the river Llobregat to the city. The Consell de Cent regarded the  
262 Llobregat waters as the “universal solution” to the recurrent problem of water supply, and  
263 published a pamphlet detailing the many advantages of the project. According to this, if  
264 the project was completed, water would be secured even in dry years, new fountains  
265 would be built, water concessions given to more buildings, cleaning of the supply network  
266 would be improved and, perhaps most importantly, agriculture based in irrigation could  
267 be developed. The city government invited several experts in water supply infrastructure  
268 from outside Barcelona, who joined Francesc Socies and set out to examine the best  
269 possible itinerary for the canal. These experts drafted a detailed proposal which accounted  
270 for significant funds required to compensate landowners and also included details about  
271 bridges to be built (AS2). Still in 1627, while the consequences of drought extended  
272 throughout Catalonia, the city government presented a petition to support the project to  
273 the Viceroy, who redirected it to King Philip IV. The Spanish king showed interest in the  
274 project, but also concerns about the landowners affected by it (Voltes Bou 1967: 58-59).  
275 Moreover, the petition arrived in the aftermath of Philip IV meeting with the  
276 representative body of Catalonia (*Corts*), held in 1626, where the King’s proposal to raise  
277 an economic and human contribution from Catalonia to support the Spanish army had  
278 utterly failed (Elliott, 1984).

279 While the Consell de Cent promoted this massive water infrastructure, the situation of  
280 water supply kept worsening. The acute dry conditions experienced during 1627 and early  
281 1628 (see Figure 4) forced to cut off water supply to almost all private users in the city  
282 and stimulated an urgent search for nearer water sources. Aware that the Llobregat canal  
283 would only be available – in the best scenario – in the medium term, the city government  
284 resolved to expand the network of the so-called “water mines” (*qanats*). As a result,  
285 Francesc Socies started working on a new *qanat* draining the Sant Gervasi torrent. This  
286 was a far less costly option, easier to connect with the rest of the water catch of the city,  
287 and works progressed rapidly between 1627 and 1629, eventually providing a significant  
288 increase in the waters delivered to Barcelona (Perelló Ferrer 1996: 126-127). According  
289 to Socies, the rich *qanat* of Sant Gervasi was key to keep the supply of the city running  
290 during the driest years between 1627 and 1650 (AS1, chapter 65). The city government  
291 complemented this intervention with substantial efforts, both in 1630 and 1631, for the  
292 conservation and upkeep of the city pipes, fixing broken sections and cleaning other  
293 clogged by earth and trees (Perelló Ferrer 1996: 127). Lacking support and resources for  
294 a major infrastructural work like the Llobregat canal, local authorities focused in  
295 improving the efficiency of the existing system.

296 Extreme drought did not only mean an immediate problem for the city fountains, but also  
297 for the water mills that milled the grain and produced flour. During dry years, the water  
298 level in the irrigation channels was not high enough for the watermills to function. This  
299 situation forced the city government to transport the grain to locations farther from the  
300 city, thus increasing the associated costs and occasionally jeopardizing the city’s supply



301 (Simon i Tarrés 1992: 165-169). The unreliability of watermills in dry years was invoked  
302 by the city government in their plea to bring the waters of Llobregat river to Barcelona  
303 via a water canal. As explained in this document, this was the reason why the city  
304 government owned two windmills outside the city walls since earlier times (AS2).  
305 However, due to the almost absence of dry years since the 1570s, these windmills had  
306 been little used. In 1628, the Consell de Cent had to request its renovation due to its poor  
307 condition. Two new windmills were commissioned the same year, and five more would  
308 follow in 1629. Therefore, the Consell addressed the unreliability of watermills during  
309 dry years with a great expansion of the city windmills, which grew from two to nine  
310 (~~450%~~) between 1628 and 1631 (Perelló Ferrer 1996: 286-288).

311 However, the real challenge was the very lack of grain to be milled in the face of the  
312 drought impacts on regional agriculture. In a context of diminishing grain supplies, the  
313 development of an alternative infrastructure to secure the transformation of grain into  
314 flour avoiding the reliance on water was futile. The impacts of the severe drought of 1627  
315 extended throughout the following years and went beyond Barcelona. A very cold winter,  
316 with snowstorms that killed many fruit trees, was followed by a very dry summer. By  
317 1628, a contemporary witness stated, “the dioceses of Barcelona, Tarragona and the plain  
318 of Urgell cry of thirst” (Simon i Tarrés 1992: 161-162). Between 1628 and 1631, dry  
319 years and extreme climate events critically affected agriculture in Catalonia, resulting in  
320 bad crops and adding new tensions to both local and regional conflicts (Simon i Tarrés  
321 1992:158-161). An international conjuncture of war and plague in Milan and southern  
322 France prevented grain imports from these regions, which could have compensated for  
323 the local losses. As a result, prices in cities like Girona and Barcelona went skyrocketing,  
324 and by the beginning of 1631 the supply of bread in Barcelona was in a critical situation.

325 In this context, some profited from selling bread that did not comply with the legal weight  
326 or mixed different types of grain. In the spring of 1631, the protests for the price, scarcity  
327 and bad quality of bread in Barcelona ended up in violent riots that threatened the very  
328 lives of the members of the city government. In response, the Consell de Cent decided to  
329 assume full control of bread production, strictly banning any production or distribution   
330 of bread by other authorities. In an attempt to secure the distribution of bread to the  
331 population, the Consell de Cent organized a centralized, street-by-street rationing system.  
332 In the end, a wheat cargo coming from Mallorca in May 1631 alleviated the shortage  
333 (Simon i Tarrés, 1992). However, the strategy of enforcing a centralized rationing system  
334 during scenarios of scarcity – or whenever these scenarios seemed feasible – remained in  
335 use during the following years.

336 During 1632 Barcelona experienced again several months without rain (Figure 4). Despite  
337 the efforts devoted to improve urban water supply sources and take care of the  
338 maintenance of the infrastructure, this year Barcelona received less than a third of its  
339 usual water supply (Voltes Bou 1967: 59). This critical situation contributed to a brief  
340 comeback of the project of a canal from the Llobregat River proposed to the Spanish king  
341 five years earlier (Perelló Ferrer 1996: 128). The city officers called water supply experts  
342 to resume the work on the canal and even started marking it on the ground (AS3). In 1633  
343 the Consell de Cent decided to go ahead with the project. However, it required the  
344 permission and Royal Privilege from King Philip IV. This could not come at a worse  
345 moment, for the 1632 meeting of the king with Catalan representative body, the *Corts*,  
346 had repeated the 1626 fiasco. The tensions between the Catalan *Corts* and the King in the  
347 years 1626-1632 certainly did not help to bring the Llobregat canal project any closer to  
348 fruition. After the city petition, Philip IV consulted the Viceroy of Catalonia as he had  
349 done in 1627 (AS4: 137, 154-155). There is no trace of the Viceroy’s reply, but some of



350 the aristocratic landowners of the territories where the canal had to be built consistently  
351 opposed the project (Voltes Bou 1967: 59-60). After 1633 we find few more references  
352 to it. Three centuries were still to pass until the waters of Llobregat were channelled to  
353 Barcelona (Burgueño, 2008; Saurí, March and Gorostiza, 2014).

354 The very mechanisms established to cope with the subsistence crisis of 1627-1631  
355 intertwined with power struggles, setting the scene for new conflicts. During 1633 the  
356 city government attempted to enforce its control of bread production and distribution, put  
357 into practice two years earlier. The insistent public calls issued to the monasteries and the  
358 Cathedral to prevent from producing and circulating bread suggest that these regulations  
359 were far from followed, and bread was distributed in several stalls in the city – not only  
360 in those depending from the city government. In this context, on the 4<sup>th</sup> of January 1634,  
361 a representative from the Consell de Cent confiscated a piece of bread that had been  
362 produced by the Cathedral. This proved that this institution was disobeying the city  
363 government calls. When the member of the Consell de Cent who had confiscated the  
364 bread refused to hand in the proof to the Cathedral, this institution arrested him and  
365 imprisoned him on ecclesiastical grounds (AS5). The reprisals from the city government  
366 came immediately in the form of arrests of several persons connected to the Cathedral,  
367 but also with a different action. The Consell de Cent ordered the water officer, Francesc  
368 Sociés, to cut off the water supply to the Cathedral. This decision triggered a dramatic  
369 confrontation between the city government and the ecclesiastical powers.

370 As previously explained, during the first quarter of the 17<sup>th</sup> century the Consell de Cent  
371 had pursued the expansion of the urban water network and gave water concessions to  
372 different aristocrats and monasteries, while at the same time retaining the right to cut off  
373 the water supply if needed. The Cathedral, however, was no ordinary monastery. When  
374 Francesc Sociés carried out the city's orders and water stopped flowing to the  
375 ecclesiastical grounds of the Cathedral, the conflict immediately escalated. The water cut  
376 lasted only a couple of hours and supply was restored, for the city government seems to  
377 have confirmed that an agreement dating back to 1355 granted the Cathedral with the  
378 right of water provision. But even if the precious liquid was soon flowing again in the  
379 Cathedral's cloister, the offense was not without results. The Cathedral's Chapter  
380 immediately excommunicated Francesc Sociés and the members of the Consell de Cent  
381 for offending the property of the Church, causing a great scandal in the city (AS5). **While**  
382 **it was bread production and distribution, and not water, what had originally been the cause**  
383 **of the dispute, legal rights about water supply and its value in time of drought were at**  
384 **stake.**

385 Moreover, the reaction of the city's government aggravated the offence against the  
386 Cathedral. Far from accepting the Cathedral's authority, the Consell de Cent called  
387 dozens of church doctors and theologians from several monasteries of the city and asked  
388 them if the excommunication was legal and valid. After deliberating on the matter, these  
389 experts concluded that the excommunication could be considered invalid due to errors in  
390 the way it had been carried out – a written statement that the city hastened to make public,  
391 printing a pamphlet and distributing it widely (AS6).

392 The Consell de Cent, even if acknowledging the Cathedral's rights to water, publicly  
393 reasserted its own role as the institution responsible of maintaining and overseeing urban  
394 water supply. As put in one of the pamphlets published in 1634, the city declared itself  
395 "master and owner of the waters that flow to its fountains" (AS7). In order to justify the  
396 water cut-off, they argued that they had not been aware that the Cathedral hold old rights  
397 to these waters, and that they immediately restored the service when they realised their



398 mistake. Accordingly, the lawyers of the Consell de Cent pointed out that committing a  
399 sin by ignorance could not justify a punishment as severe as an excommunication (AS7).  
400 The Cathedral's Chapter, on the other side, considered that both the city government and  
401 the city water officer had been perfectly aware that waters belonged to the Cathedral, and  
402 therefore underlined that the water cut-off had to be considered an aggravated crime  
403 against the Church properties – one that was punished with excommunication (AS8).

404 The legal case fell in the hands of the Archbishop of Tarragona, and mutual accusations  
405 between the Cathedral and the Consell continued for months, even if the  
406 excommunications were provisionally lifted after a few weeks (AS4:205-206). Soon  
407 afterwards, major events seem to have taken over this quarrel. War broke out between  
408 Spain and France in 1635, and Catalan territories immediately became a space in dispute.  
409 Moreover, the Catalan revolt of 1640 split the region from the Spanish crown until 1652.  
410 Beyond these grand changes, however, the daily work to keep the water running to  
411 Barcelona remained a challenge – and Francesc Socies remained in charge.

412

#### 413 **4. Codifying knowledge about water supply: The Book of Fountains (1650)**

414 The scandal of the excommunication of the Consell de Cent and the city water officer  
415 came after some of the driest years remembered in Barcelona (1626-1632). The city  
416 government emerged from the conflict with renovated sensibility about the importance of  
417 enforcing control over water supply, but also over the very knowledge about water  
418 concessions, which could help avoiding similar conflicts in the future. In line with the  
419 declaration that the city was “master and owner of the waters that flow to its fountains”,  
420 during the following years the city government devoted more and more attention to watch  
421 out its water resources and remained wary of any violation of its water rights. At the same  
422 time, it launched an initiative to take over the water knowledge embodied by the city  
423 water officer.

424

##### 425 *4.1 The origins of the Book of Fountains*

426 In 1641 the Barcelona water officer, Francesc Socies, completed his 21st year in his post.  
427 It was not without surprises. In December, water stopped flowing to the fountain of Sant  
428 Joan. Despite all efforts, it was impossible to determine the cause, and when the water  
429 flow resumed after two months, it left Socies puzzled. When this repeated next year  
430 around the same dates, the water officer was convinced that someone was illegally  
431 tapping into the network. During the following years, the water loss in the fountain of  
432 Sant Joan became one of Socies' main headaches. His inability to find the reason behind  
433 it compromised his authority in front of the Consell. This problem may have been not so  
434 serious had it not been accompanied by another long repetition of dry years. But the  
435 extreme weather suffered throughout Spain in 1640-1643 (Parker 2013: 289), followed  
436 in Barcelona by several dry years in a row (1643 to 1651, see Figure 4), made it more  
437 pressing.

438 In 1644, the city government went as far as approving a search into all the houses close  
439 to the main pipe to find where the water leak was or who had illegally drilled into the pipe  
440 and set a tap. It even offered rewards in exchange for information, but all attempts to find  
441 out the cause of water loss proved fruitless. Eventually, in 1647, Socies was ordered to  
442 remake the whole sector of the pipeline that supplied the fountain, connecting it to another  
443 branch of the distribution system (AS1, chapter 22; Perelló Ferrer 1996:128). These  
444 efforts to enforce control of water distribution came hand in hand with initiatives to  
445 expand the water sources of the city supply system. During the second half of the 1640s



446 the Consell de Cent approved the construction of a new *qanat* in Pedralbes, while also  
447 devoting funds to the improvement of the city fountains (Perelló Ferrer 1996:129).  
448 Crucially, however, the Consell lacked a detailed knowledge of the water system and  
449 therefore depended on the city water officer for carrying out almost any change or  
450 improvement to the water supply and distribution infrastructure. The persistent droughts  
451 of these years only made this circumstance more evident. Francesc Socies was aging with  
452 no successor in sight. In this context, during the summer of 1648 the city government  
453 decided to put forward a proposal to him.

454 Traditionally, when approaching retirement, it was the city water officer who would ask  
455 the city government to perform his duties accompanied with an assistant – usually his son  
456 or son-in-law. After working together several years – receiving only one salary – the  
457 apprentice would then replace the city water officer in his post (Perelló Ferrer 1996:77).  
458 This father-to-son tradition kept knowledge in the hands of city water officers’ families  
459 and away from the Consell de Cent, which therefore remained fully dependant on him.  
460 Francesc Socies, however, had no direct relatives to work with. His son was a monk in  
461 Montserrat monastery, and his two sons-in-law already had their own profession.

462 Perhaps taking advantage of Socies’ situation and his questioned authority after the  
463 unresolved water thefts, this time it was the Consell de Cent that took the initiative. On  
464 July 8, 1648, after a significantly dry spring (see Figure 4), it formally required Socies to  
465 write a book about the city water supply and the operation of the city’s fountains.  
466 According to the Consell’s instructions, the book would remain perpetually in the city  
467 government’s grounds, “for the clarity of [the officer’s] successors in his post”, therefore  
468 showing an explicit intention of appropriating the knowledge inherently associated to the  
469 water officer’s job post and codifying it for future uses, always under the Consell’s control.  
470 The manifest objective of keeping the proposed book in the Consell’s grounds also made  
471 clear another aim of the city government: to reinforce its position as the only institution  
472 managing and owning water in the city, and therefore to reaffirm its capacity to use water  
473 as a tool to control urban space (AS9:325-326). The writing of a book about the city  
474 waters, kept by the Consell de Cent, was fully in line with the statement made in 1634. In  
475 terms of water property and rights, writing was an instrumental juridical tool for the city  
476 government to reassert itself as the “master and owner of the waters that flow to  
477 [Barcelona] fountains”.

478 Moreover, from the perspective of the Consell, water knowledge was also key to attain a  
479 more efficient and less-costly daily management of water supply. The proposed book,  
480 according to the Consell’s proposal, should result in great benefit of the fountains and  
481 would reduce the expenditure they required, since it would facilitate finding out about  
482 any problem they could suffer (AS9:325-326). After all, aside from his regular salary to  
483 maintain the water distribution system, the city water officer had to be paid for each  
484 specific work he carried out. Considering the troubled decades of 1620-1650, the  
485 Consell’s attempt to appropriate the city water officer’s knowledge can also be interpreted  
486 as an attempt to anticipate future difficulties by codifying the knowledge of the past – in  
487 other words, by developing tools for future generations to cope with the variability of the  
488 climate and its impact into the water supply and distribution network of the city.

489 Francesc Socies took two years to provide a formal answer. In September 1650, amid a  
490 very severe drought (see Figure 4), he finally offered to write the proposed book, under  
491 one condition. In exchange for it, he demanded to receive a salary until the end of his life,  
492 whether he was working or not. On September 6, 1650, the Consell accepted Socies’ offer,  
493 highlighting that the water officer had been more than three decades at the service of the

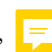





494 city and stating that payments would start as soon as the book was delivered (AS9:325-  
495 326). In fact, Sociés had started to write what would later be known as the *Llibre de les*  
496 *Fonts* (“Book of Fountains”) at least two months earlier, in July 1650. In his writing,  
497 Francesc Sociés went over the water geography of the city, but also revisited more than  
498 thirty years of Barcelona’s water supply history.

499

#### 500 4.2 Structure and contents of the Book of Fountains

501 The Book of Fountains adopts the form of a manual about urban water supply, a text  
502 where Sociés provides instructions that codify both the knowledge of his profession and  
503 the experience of his job position, aimed at guiding future interventions in the supply  
504 system and communicating what new workers will need to know.  elaboration shall be  
505 contextualised within the emergence of technical and practical manuals to transmit  
506 knowledge (Eamon, 1994; Long, 2001; Cifuentes i Comamala, 2006). The water  
507 distribution system is described as an interconnected network, from the drainage  
508 underground channels in the hills of Barcelona known as “water mines” (*qanats*) to the  
509 city fountains. Water supply is conceived as part of a human system, where urban  
510 elements are interdependent (if water is cut in one section, other sections will be left  
511 unsupplied). This network is examined and described both technologically and socially.  
512 The knowledge that the city water officer pours into the book is a thorough technical  
513 description of the journey followed by water through the city, indicating with high  
514 precision where each element is located, both for those visible and those hidden from  
515 view, underground or behind walls (water taps, pipes, water tanks or wells).

516 The Book of Fountains is a knowledge manual but was also conceived as a tool to be used.  
517 When referring to specific places in the city, the author often establishes a symbolic  
518 relation between the written text and the urban fabric. Text and territory become  
519 inseparable, and as a connector, the author uses a figure – the cross – sometimes in the  
520 text but more often in its margins, making its location faster to readers. These crosses  
521 written in the text refer to crosses chiselled in the stone walls of the street buildings,  
522 indicating specific elements of water infrastructure hidden from view and thus binding  
523 the book pages with the urban fabric of the city. In other words: the author inscribes water  
524 urban geography into the pages of the Book of Fountains.

525 As both a manual and a tool, the Book of Fountains does not only provide readers with a  
526 geography of the water network elements, but also with a calendar for the system’s  
527 maintenance. Instructions are provided within a particular urban space and time. Sociés  
528 specifies where to intervene and how often, for instance in relation to the cleaning of  
529 pipes and curtailing the growth of trees’ roots that can disrupt sections of the system (e.g.  
530 every two, four of five years). Nevertheless, Sociés’ temporal specifications do not only  
531 apply to maintenance, but also to key historical information about water property rights.  
532 While writing the book, Sociés visited the city archive and consulted the Consell’s  
533 meeting proceedings in order to record the water right concessions to several monasteries,  
534 dating from 1611. He left a clear reference to where these legal documents could be found.  
535 Similarly, he visited the archive of the Cathedral’s Chapter, providing detailed  
536 information about the old pipes underground the building and reminding future readers  
537 about the agreement between the Cathedral and the city government, dating from 1355,  
538 which granted the Cathedral the ownership of the waters flowing to it (AS1, chapters 26  
539 and 56). In other words, he recorded this information for the future city water managers,  
540 setting the basis to prevent conflicts such as the one occurred in 1634.



541 Additionally, in order to ensure that the Book of Fountains remained a useful tool, Sociés  
542 demanded the involvement of his readers – the future city water officers. Sociés asked  
543 them to use the book, recording any intervention in the water network in the margins of  
544 the text, and therefore keeping knowledge to date for future generations (AS1:262). By  
545 involving future water officers into the authorship in a transgenerational endeavour, the  
546 book aimed at becoming collective heritage. In this way it became useful for the present  
547 as a physical object, but more than that, a perdurable, indispensable tool for the city's  
548 future. The transmission of knowledge to the future became a tool to manage risks  
549 affecting the city water supply.

550 Starting at the main water tank distributor of Barcelona, outside the city walls, the Book  
551 of Fountains provides a detailed description of the main pipe supplying the city, each of  
552 its branches and sections, along with the buildings receiving water supply and the location  
553 of the very water conduits. Later in the text, Sociés turns his attention to the “water mines”  
554 (*qanats*) in the hills of the city. Therefore, with his writing the water city officer  
555 establishes the water's urban journey from source to tap, fixing and at the same time  
556 defining who the proprietor of this knowledge is, and institutionalizing who has the power  
557 to control it. This intention of controlling urban space, based on the need of preserving  
558 water supply, it is well apparent in Sociés' instructions to future managers. In order to  
559 keep a regular water flow running in the city's fountains, the city government needs to be  
560 able to detect and solve any incident rapidly, particularly in relation to water thefts. To  
561 this end, Sociés narrates how he has been remaking the water network that runs through  
562 internal parts of buildings, moving it to their external sections, in order to hinder any  
563 attempt to illegally tap into the water network. He recommends continuing with these  
564 reforms in order to put the network as close as possible to the control of the water city  
565 officer and the city government (AS1, chapters 26, 78 and 79).

566 Among the detailed knowledge demonstrated, Sociés also provided his testimony on the  
567 state of water supply during the summer of 1650, when he was writing the Book of  
568 Fountains. In July 1650, when he started the book, the dry spell in Barcelona was already  
569 ongoing, with *pro pluvia* rogations in the streets since April (see Figure 4). Exploring the  
570 *qanats* of Nostra Senyora del Coll, Sociés pointed out that it was the first time in his life  
571 that he saw them dry, and commented that as years passed by, the flow of water in the  
572 city had been decreasing. He specifically pointed to the years 1626-1627 as the moment  
573 when this “lack of waters” had started, and underlined the importance of the Sant Gervasi  
574 *qanat*, whose construction he had led in the late 1620s, to keep Barcelona supplied in  
575 these dry years (AS1, chapter 65).

576 Likewise, throughout the book Francesc Sociés reminded readers of the many works and  
577 improvements he carried out in the water network and the date when they took place.  
578 Writing provided social and historical prestige, and the Book of Fountains not only  
579 institutionalized the control of the city government over water, but also qualified Francesc  
580 Sociés as the water expert of his epoch. In this regard, the book has a similar function to  
581 that which institutional chronicles had at the time, authored by the political institutions of  
582 Catalonia (Simon i Tarrés, 2005). Moreover, in relation to the water officer, the prestige  
583 associated with authorship of the Book of Fountains could overshadow his compromised  
584 position in relation to the unresolved 1640s water thefts and perhaps the scandalous 1634  
585 excommunication.

586 The dry summer of 1650 eventually caused the loss of the harvest and made the year  
587 known as “the year of misery” (Guàrdia, Pladevall i Font and Simon i Tarrés, 1986:105).  
588 However, rains finally arrived in mid-October, a few days after the Consell organized a





589 major *pro-pluvia* rogation. A week of rain saved the sowing and was celebrated with a *Te*  
590 *Deum Laudamus* at the Cathedral on October 23. Socies probably finished the Book of  
591 Fountains around the time. On November 14, 1650, he walked into the meeting of the  
592 Consell de Cent and made a ceremonious presentation of the Book of Fountains  
593 (AS9:400).

594

## 595 **5. Conclusions**

596 This article has examined the human response to drought in the city of Barcelona  
597 (Western Mediterranean) during the years 1620-1650. After establishing the regional  
598 significance of drought in the Western Mediterranean during 1620-1640 with literature  
599 on climate history relying on ecological proxies (Nicault *et al.*, 2008), in the first part of  
600 the article we analysed the historical climatology of Catalonia and Barcelona drawing on  
601 *pro pluvia* rogations as documentary proxy data. This analysis has identified two main  
602 periods of drought in the city (1625-1635 and the 1640s) as the most significant drought  
603 events of the period 1521-1825 (highest Drought Frequency Weighted Index of the series).

604 Building on this, the main part of the paper has explored the institutional strategies  
605 deployed by the city government in response to severe drought between 1626 to 1650. A  
606 key determinant to this analysis is the long period without significant droughts  
607 immediately before these years (1570-1620). Several sources point to an expansion of the  
608 urban water supply and the water concessions granted by the Barcelona city government  
609 during the first quarter of the 17<sup>th</sup> century. Both rain rogations, the testimony of the city  
610 water officer and printed sources confirm that these times of abundance finished in 1626-  
611 1627. During the following five years, drought and general climate variability, combined  
612 with the international context of war and plague in Milan contributed to produce a supply  
613 crisis in Barcelona, where riots for bread took place in 1631. During these years, water  
614 scarcity was felt both in the city fountains and the watermills, which in some occasions  
615 could not mill the grain. The city government launched several initiatives to alleviate the  
616 problems caused by water scarcity. Large infrastructural projects such as the Llobregat  
617 water canal failed due to the lack of financial and political support. This failure privileged  
618 other, softer measures of adaptation: the expansion of water supply sources in the hills  
619 near Barcelona, the investments to maintain and clean the city pipes, or a great expansion  
620 of windmills as an alternative to mill grain not depending on water.

621 In this context of water scarcity, tensions around water availability increased. One of the  
622 loudest public conflicts of the period was related to water and confronted the city  
623 government and the Barcelona Cathedral in early 1634. As proven by drought  
624 reconstruction, the conflict broke out after several dry years (1627-1632), but no direct  
625 causality can be established between drought and social conflict. After the 1626-1627  
626 drought and the climate variability that contributed to the supply crisis and the 1631 riots  
627 in Barcelona, the city government had introduced a centralized rationing system for the  
628 distribution of bread. Even if the shortage was over by 1633, the system remained in use  
629 and the city government continued to enforce it. It is the power to produce and distribute  
630 bread that originally sparked the conflict with the Cathedral. Cutting off water supply was  
631 one of the reprisals carried out by the Consell against the Cathedral – and certainly one  
632 that had scandalous consequences and developed its own course. But it was not the cause  
633 of the conflict. Nonetheless, the severe drought experienced the previous years and the  
634 diminished flow of water available in the city's pipes made water a handy weapon to use.  
635 So while we cannot interpret the 1634 confrontation as caused by water scarcity, the  
636 impact of drought in water supply certainly helps explaining how the precious liquid



637 became a weapon, transforming a quarrel over bread distribution rights into a major legal  
638 case leading to the excommunication of the city government officials – including the city  
639 water officer. 

640 Beyond this, the relevance of the 1634 conflict for water management during the  
641 following years is twofold. First, it illustrated the ambiguities and difficulties of the city  
642 government when dealing with water concessions. The Consell de Cent rapidly  
643 acknowledged it had committed a mistake when cutting off water supply, because the  
644 agreement between both institutions to guarantee the water flows to the Cathedral dated  
645 back to 1355. Regardless of the political intentions of the city government, the existence  
646 of diverse agreements, contracts and water concessions between the city and other  
647 institutions – signed in past times, when water supply was more abundant – justified the  
648 codification of water knowledge into a unique book/tool. From this perspective, the Book  
649 of Fountains can be interpreted as an outcome of the institutional learning of the most  
650 severe drought period experienced in Barcelona between 1521 and 1825, and as a tool to  
651 prevent similar conflicts such as the one sustained with the Cathedral. In addition, from a  
652 political perspective, the 1634 conflict only reinforced the city government’s legal claims  
653 over the management of urban water supply. In the legal discussion following the conflict,  
654 the Consell de Cent declared itself the “master and owner of the waters that flow to  
655 [Barcelona] fountains”. A coherent step to reassert these claims was to codify knowledge  
656 about urban water rights, water distribution and maintenance into a book. On top of this,  
657 as previously discussed, the contract to produce the Book of Fountains underlined its  
658 critical value and banned the removal of the book from the city government’s premises.  
659 On its own, the Book of Fountains is a technical manual describing urban water supply.  
660 But its contextualisation within the social conflicts and historical climatology of the  
661 period points to its unequivocal political character. Crucially, this is only possible by  
662 combining several documentary sources, since the author of the Book of Fountains  
663 follows a descriptive pattern with a neutral tone, making no explicit political claims on  
664 water.

665 In conclusion, the appropriation of the city water officer’s knowledge by the Consell de  
666 Cent, legally binding the resulting Book of Fountains and the knowledge it embodies to  
667 the city’s premises, can be interpreted as an adaptation strategy and an attempt to make  
668 the water supply system more efficient in a context of frequent and severe drought.  
669 Anticipating the future is required in order to adapt to variability, and the codification of  
670 knowledge aims at taking it from a specific family line or profession, to use it for the  
671 common good of the city. It is a “public” effort to overcome the private transmission of  
672 information from father-to-son and use it for the common future good, but also a  
673 reinforcement of the authority of the city government in relation to a precious resource in  
674 times of drought: water. The knowledge collected in the Book of Fountains has the  
675 potential to make the functioning of the urban water supply more efficient, avoiding  
676 conflicts and reducing expenditure. Hence the key call to involve future water city officers  
677 in updating the Book of Fountains, aiming at the creation of a transgenerational tool to  
678 cope with future risks associated with urban water supply.

679 Last but not least, the Book of Fountains is also useful as a source for historical  
680 climatology.  Not only it originates during the most significant drought period identified  
681 in Barcelona between 1521-1825, but it provides access to the perception of water flows  
682 from a very authoritative voice: that of the local expert on water supply, in office for three  
683 decades (1620-1650). Writing in the summer of 1650, during an extreme episode of  
684 drought, Francesc Sociés testimony depicts the years 1626-1627 as the beginning of a  
685 period of water scarcity in Barcelona. Both references are coherent with the analysis of



686 drought presented in the first part of this article (figures 2, 3 and 4), drawing on *pro pluvia*  
687 rogations as documentary proxy data. Considering the regional extent of the dry period  
688 of 1620-1640 in the Western Mediterranean (Nicault *et al.*, 2008), our case study shows  
689 the potential of examining human response to drought and water stress from the  
690 institutional perspective.

691

#### 692 **Author contribution**

693 Santiago Gorostiza conceived this research with Maria Antònia Martí Escayol and wrote  
694 the introduction, conclusion and section 3 of the text. He made significant contributions  
695 to the rest of the text. In addition, he handled the coordination, integration, translation and  
696 revision of texts.

697 Maria Antònia Martí Escayol conceived this research with Santiago Gorostiza and wrote  
698 section 4 of the text. Martí Escayol transcribed the *Llibre de les Fonts de la Ciutat de*  
699 *Barcelona* and made significant contributions to the introduction, section 3 and  
700 conclusions of the text.

701 Mariano Barriendos prepared the drought series for Catalonia and Barcelona, handled the  
702 database organization, statistical treatment, graphic production, and preparation of the  
703 tables and figures. Barriendos wrote the section 2 of the text.

704

#### 705 **Acknowledgments**

706 Santiago Gorostiza acknowledges financial support from the Spanish Ministry of Science,  
707 Innovation and Universities, through the “María de Maeztu” program for Units of  
708 Excellence (MDM-2015-0552). This research was presented at the European Society of  
709 Environmental History in Tallinn (August 2019) and the Watermarks workshop at ICTA-  
710 UAB (October 2020). The authors thank the participants in these events for their  
711 comments and criticisms. Santiago Gorostiza thanks Ekaterina Chertkovskaya for  
712 revising the text.

713

#### 714 **Competing interests**

715 The authors declare no competing interests.

716

#### 717 **Archival sources**

718

719 [AS1] *Llibre de les Fonts*, Manuscrits, L-15, Arxiu Històric de la Ciutat de Barcelona  
720 (AHCB).

721

722 [AS2] Consell de Cent, Barcelona. “Discurs fet per orde dels... consellers, obrers, y saui  
723 Concell de Cent, en lo aniuellar y aportar una sequia de aygua del riu de Lobregat, à la  
724 ciutat de Barcelona, als 9 de maig 1627”, Manuscrits Bonsoms, F. Bon. 5410,  
725 Biblioteca de Catalunya.

726

727 [AS3] AHCB, Deliberacions, Consell de Cent II-142, 1633, fol. 144-147.

728

729 [AS4] AHCB, *Manual de novells ardots vulgarment apellat Dietari del Antich Consell*  
730 *Barceloní*, vol. 11 (1632-1636).



- 731  
732 [AS5] Consell de Cent, Barcelona. “Informacion de la ivsticia qve tiene la civdad de  
733 Barcelona en la cavsa sobre qve aora trae pleyto con el Cabildo de la Santa Iglesia  
734 Catedral de la misma ciudad en el Tribunal y Corte eclesiastica del Illustrissimo Señor  
735 Arçobispo de Tarragona”, 1634. F.Bon. 5402, Biblioteca de Catalunya.  
736  
737 [AS6] “Resolucion theologica en la duda que en esta ciudad de Barcelona ha hauido  
738 sobre sí los que concurrieron en quitar el agua que sale en las fuentes de los claustros de  
739 la Santa Iglesia del Asseo desta ciudad por espacio de algunas horas incurrieron en las  
740 censuras de las constituciones prouinciales tarraconeneses y apostolicas”, 1634. F.Bon.  
741 4873, Biblioteca de Catalunya.  
742  
743 [AS7] Consell de Cent, Barcelona. “Por la civdad de Barcelona y Francisco Sossies,  
744 maestro de las fventes, con el Cabildo de la Iglesia Maior acerca de las censuras  
745 declaradas contra el dicho Sossies”, 1634. F.Bon. 10964, Biblioteca de Catalunya.  
746  
747 [AS8] Capítol de la Catedral de Barcelona. “Per lo Capítol y canonges de la Seu de  
748 Barcelona, en defensa de la sentencia proferida per lo official eclesiastich a 5 de Ianer  
749 1634, declarant que Fra[n]cesch Socies, mestre de les fonts de la ciutat, y los demes  
750 complices en lleuar la aygua de la font que te dita iglesia eran excomunicats y posant  
751 entredit”, 1634. F.Bon. 11466, Biblioteca de Catalunya.  
752  
753 [AS9] AHCB, Deliberacions, Consell de Cent II-159, 1650.  
754  
755

## 756 References

- 757  
758 Barriendos, M. (1996) ‘El clima historico de Catalunya (siglos XIV-XIX). Fuentes,  
759 métodos y primeros resultados’, *Revista de Geografía*, 30–31, pp. 69–96.  
760 Barriendos, M. (1997) ‘Climatic variations in the Iberian Peninsula during the late  
761 Maunder minimum (AD 1675-1715): An analysis of data from rogation ceremonies’,  
762 *Holocene*, 7(1), pp. 105–111. doi: 10.1177/095968369700700110.  
763 Barriendos, M. *et al.* (2019) ‘Climatic and social factors behind the Spanish  
764 Mediterranean flood event chronologies from documentary sources (14th – 20th  
765 centuries)’, *Global and Planetary Change*. Elsevier, 182(July), p. 102997. doi:  
766 10.1016/j.gloplacha.2019.102997.  
767 Barriendos, M. and Martin-Vide, J. (1998) ‘Secular climatic oscillations as indicated by  
768 catastrophic floods in the Spanish Mediterranean coastal area (14th-19th centuries)’,  
769 *Climatic Change*, 38(4), pp. 473–491. doi: 10.1023/A:1005343828552.  
770 Burgueño, J. (2008) *El Mapa com a llenguatge geogràfic. Recull de textos històrics (ss.*  
771 *XVII-XX) : Diago, Borsano, Aparici, Canellas, Massanés, Bertran, Cerdà, Papell,*  
772 *Ferrer, Vila.* Barcelona: Societat Catalana de Geografia.  
773 Cifuentes i Comamala, L. (2006) *La ciència en català a l’Edat Mitjana i el*  
774 *Renaixement.* 2a ed. rev. Palma de Mallorca: Universitat de Barcelona.  
775 Cubeles, A. (2011) ‘El “Libre de les fonts” del mestre Socies i l’abastament d’aigua de  
776 beure a Barcelona al segle XVII’, in Guàrdia i Bassols, M. (ed.) *La Revolució de l’aigua*  
777 *a Barcelona : de la ciutat preindustrial a la metròpoli moderna, 1867-1967.* Barcelona:  
778 Ajuntament de Barcelona, pp. 45–50.



- 779 Custodio, E. (2012) ‘The History of Hydrogeology in Spain’, in Howden, N. and  
780 Mather, J. (eds) *History of Hydrogeology*. Boca Raton: Taylor & Francis, pp. 291–316.
- 781 Díaz, M. P. (1984) ‘Aproximación a la climatología en la Cataluña del siglo XVII  
782 (según fuentes de la época)’, in *Primer Congrés d’Història Moderna de Catalunya:*  
783 *Barcelona, del 17 al 21 de desembre de 1984*, pp. 255–266.
- 784 Eamon, W. (1994) *Science and the secrets of nature : books of secrets in medieval and*  
785 *early modern culture*. Princeton, N.J.: Princeton University press.
- 786 Elliott, J. H. (1984) *The revolt of the Catalans: a study in the decline of Spain (1598-*  
787 *1640)*. Cambridge: Cambridge University Press.
- 788 Grau-Satorras, M. *et al.* (2016) ‘Long-term community responses to droughts in the  
789 early modern period: the case study of Terrassa, Spain’, *Ecology and Society*, 21(2).  
790 doi: 10.5751/ES-08232-210233.
- 791 Grau-Satorras, M. (2017) *Adaptation before anthropogenic climate change: a historical*  
792 *perspective on adaptation to droughts in Terrassa (1600-1870s, NE Spain)*. UAB.  
793 Available at: <https://www.tesisenred.net/handle/10803/405252>.
- 794 Grau-Satorras, M. *et al.* (2018) ‘Prudent peasantries: Multilevel adaptation to drought in  
795 early modern Spain (1600-1715)’, *Environment and History*. Available at:  
796 <http://www.whpress.co.uk/EH/papers/1375-Grau-Satorras.pdf>.
- 797 Guàrdia, J., Pladevall i Font, A. and Simon i Tarrés, A. (1986) *Guerra i vida pagesa a*  
798 *la Catalunya del segle XVII : segons el Diari de Joan Guàrdia, pagès de l’Esquirol, i*  
799 *altres testimonis d’Osona*. Barcelona : Curial.
- 800 Guàrdia, M. (2011) ‘L’aigua de les fonts’, in *La Revolució de l’aigua a Barcelona : de*  
801 *la ciutat preindustrial a la metròpoli moderna, 1867-1967*. Barcelona: Ajuntament de  
802 Barcelona, pp. 40–44.
- 803 Llasat, M. C. *et al.* (2005) ‘Floods in Catalonia (NE Spain) since the 14th century.  
804 Climatological and meteorological aspects from historical documentary sources and old  
805 instrumental records’, *Journal of Hydrology*, 313(1–2), pp. 32–47. doi:  
806 10.1016/j.jhydrol.2005.02.004.
- 807 Long, P. O. (2001) *Openness, secrecy, authorship : technical arts and the culture of*  
808 *knowledge from antiquity to the Renaissance*. Baltimore: Johns Hopkins University  
809 Press.
- 810 Martín-Vide, J. and Barriendos, M. (1995) ‘The use of rogation ceremony records in  
811 climatic reconstruction: a case study from Catalonia (Spain)’, *Climatic Change*, 30(2),  
812 pp. 201–221. doi: 10.1007/BF01091842.
- 813 Nicault, A. *et al.* (2008) ‘Mediterranean drought fluctuation during the last 500 years  
814 based on tree-ring data’, *Climate Dynamics*, 31(2–3), pp. 227–245. doi:  
815 10.1007/s00382-007-0349-3.
- 816 Oliva, M. *et al.* (2018) ‘The Little Ice Age in Iberian mountains’, *Earth-Science*  
817 *Reviews*, 177(October 2017), pp. 175–208. doi: 10.1016/j.earscirev.2017.11.010.
- 818 Parker, G. (2013) *Global Crisis: War, Climate Change & Catastrophe in the*  
819 *Seventeenth Century*. New Haven: Yale University Press.
- 820 Perelló Ferrer, A. M. (1996) *L’arquitectura civil del segle XVII a Barcelona*.  
821 Barcelona : Publicacions de l’Abadia de Montserrat.



- 822 Rodrigo, F. S. and Barriendos, M. (2008) ‘Reconstruction of seasonal and annual  
823 rainfall variability in the Iberian peninsula (16th-20th centuries) from documentary  
824 data’, *Global and Planetary Change*, 63(2–3), pp. 243–257. doi:  
825 10.1016/j.gloplacha.2007.09.004.
- 826 Saurí, D., March, H. and Gorostiza, S. (2014) ‘Des ressources conventionnelles aux  
827 ressources non conventionnelles: l’approvisionnement moderne en eau de la ville de  
828 Barcelone’, *Flux*, 97–98(4), pp. 101–109.
- 829 Serra i Puig, E. and Ardit, M. (2008) *Història Agrària dels Països Catalans. Volum 3:*  
830 *Edat Moderna*. Barcelona : Fundació Catalana per a la Recerca.
- 831 Simon i Tarrés, A. (1981) ‘Catalunya en el siglo XVII. La revuelta campesina y popular  
832 de 1640’, *Estudi general : Revista de la Facultat de Lletres de la Universitat de Girona*,  
833 pp. 137–147.
- 834 Simon i Tarrés, A. (1992) ‘Els anys 1627-32 i la crisi del segle XVII a Catalunya’,  
835 *Estudis d’Historia Agraria*, 9, pp. 157–180.
- 836 Simon i Tarrés, A. (2005) ‘Un dietari institucional fins ara ignorat: el dietari del Reial  
837 Consell Criminal’, *Manuscrits: Revista d’Història Moderna*, (23), pp. 97–108.
- 838 Sowina, U. (2016) *Water, Towns and People*. Frankfurt am Main: Peter Lang.
- 839 Thorndycraft, V. R. *et al.* (2006) ‘The catastrophic floods of AD 1617 in Catalonia  
840 (northeast Spain) and their climatic context’, *Hydrological Sciences Journal*, 51(5), pp.  
841 899–912. doi: 10.1623/hysj.51.5.899.
- 842 Voltes Bou, P. (1967) *Historia del abastecimiento de agua de Barcelona*. Barcelona :  
843 Sociedad General de Aguas de Barcelona.
- 844
- 845
